# Supplementary material for: A fibrolytic potential in the human ileum mucosal microbiota revealed by functional metagenomic
Source: PubMed Central journal article supplement (PMC5238381; doi:10.1038/srep40248), 2017-01-16
Supplement: srep40248-s1.pdf [file srep40248-s1.pdf]

## SUPPLEMENTARY INFORMATION

### **A fibrolytic potential in the human ileum mucosal microbiota revealed by functional metagenomic.**

Orlane Patrascu<sup>1</sup>, Fabienne Béguet-Crespel<sup>1</sup>, Ludovica Marinelli<sup>1</sup>, Emmanuelle Le Chatelier<sup>2</sup>, Anne-Laure Abraham<sup>1</sup>, Marion Leclerc<sup>1</sup>, Christophe Klopp<sup>3</sup>, Nicolas Terrapon<sup>4,5</sup>, Bernard Henrissat<sup>4,5,6</sup>, Hervé M Blottière<sup>1,2</sup>, Joël Doré<sup>1,2</sup> & Christel Béra-Maillet<sup>1\*</sup>

<sup>1</sup> Micalis Institute, INRA, AgroParisTech, Université Paris-Saclay, 78350 Jouy-en-Josas, France

<sup>2</sup>Metagenopolis, INRA, 78352 Jouy-en-Josas, France

<sup>3</sup>Plate-forme bio-informatique Genotoul, Mathématiques et Informatique Appliquées de Toulouse, INRA, Castanet-Tolosan, France

<sup>4</sup>CNRS UMR 7257, Aix-Marseille University, 13288 Marseille, France

<sup>5</sup>INRA, USC 1408 AFMB, 13288 Marseille, France

<sup>6</sup>Department of Biological Sciences, King Abdulaziz University, Jeddah, Saudi Arabia

\* Corresponding author: Dr Christel Béra-Maillet

Mailing address: UMR1319 MICALIS, INRA, Domaine de Vilvert, F-78352 Jouy-en-Josas cedex 9, France; phone: +33 1 3465 2784; e-mail: [christel.maillet@inra.fr](mailto:christel.maillet@inra.fr)

## SUPPLEMENTARY FIGURE AND TABLE LEGENDS

**Supplementary Figure S1:** Radial plot of EggNOG functional category assignments of the non-redundant CDS for each clone considered individually (see Fig. 3 for the legend).

**Supplementary Table S1:** BlastP output for EggNOG assignments of the non-redundant CDS of the eleven clones.

**Supplementary Table S2:** All CDS connections, taxonomic affiliations and annotations between the eleven metagenomic clones.

**Supplementary Table S3:** Putative activities of the evidenced Glycoside Hydrolase (GH) and Carbohydrate Esterase (CE) families in the eleven positive clones.

**Supplementary Table S4:** *in silico* analysis of GH homologous genes in available metagenomes from the ileum intestinal site.

**Supplementary Table S5:** BlastP output of homologous genes from the MetaHit 9.9M reference catalogue to the positive clone CDS-encoding genes.

**SUPPLEMENTARY FIGURE**

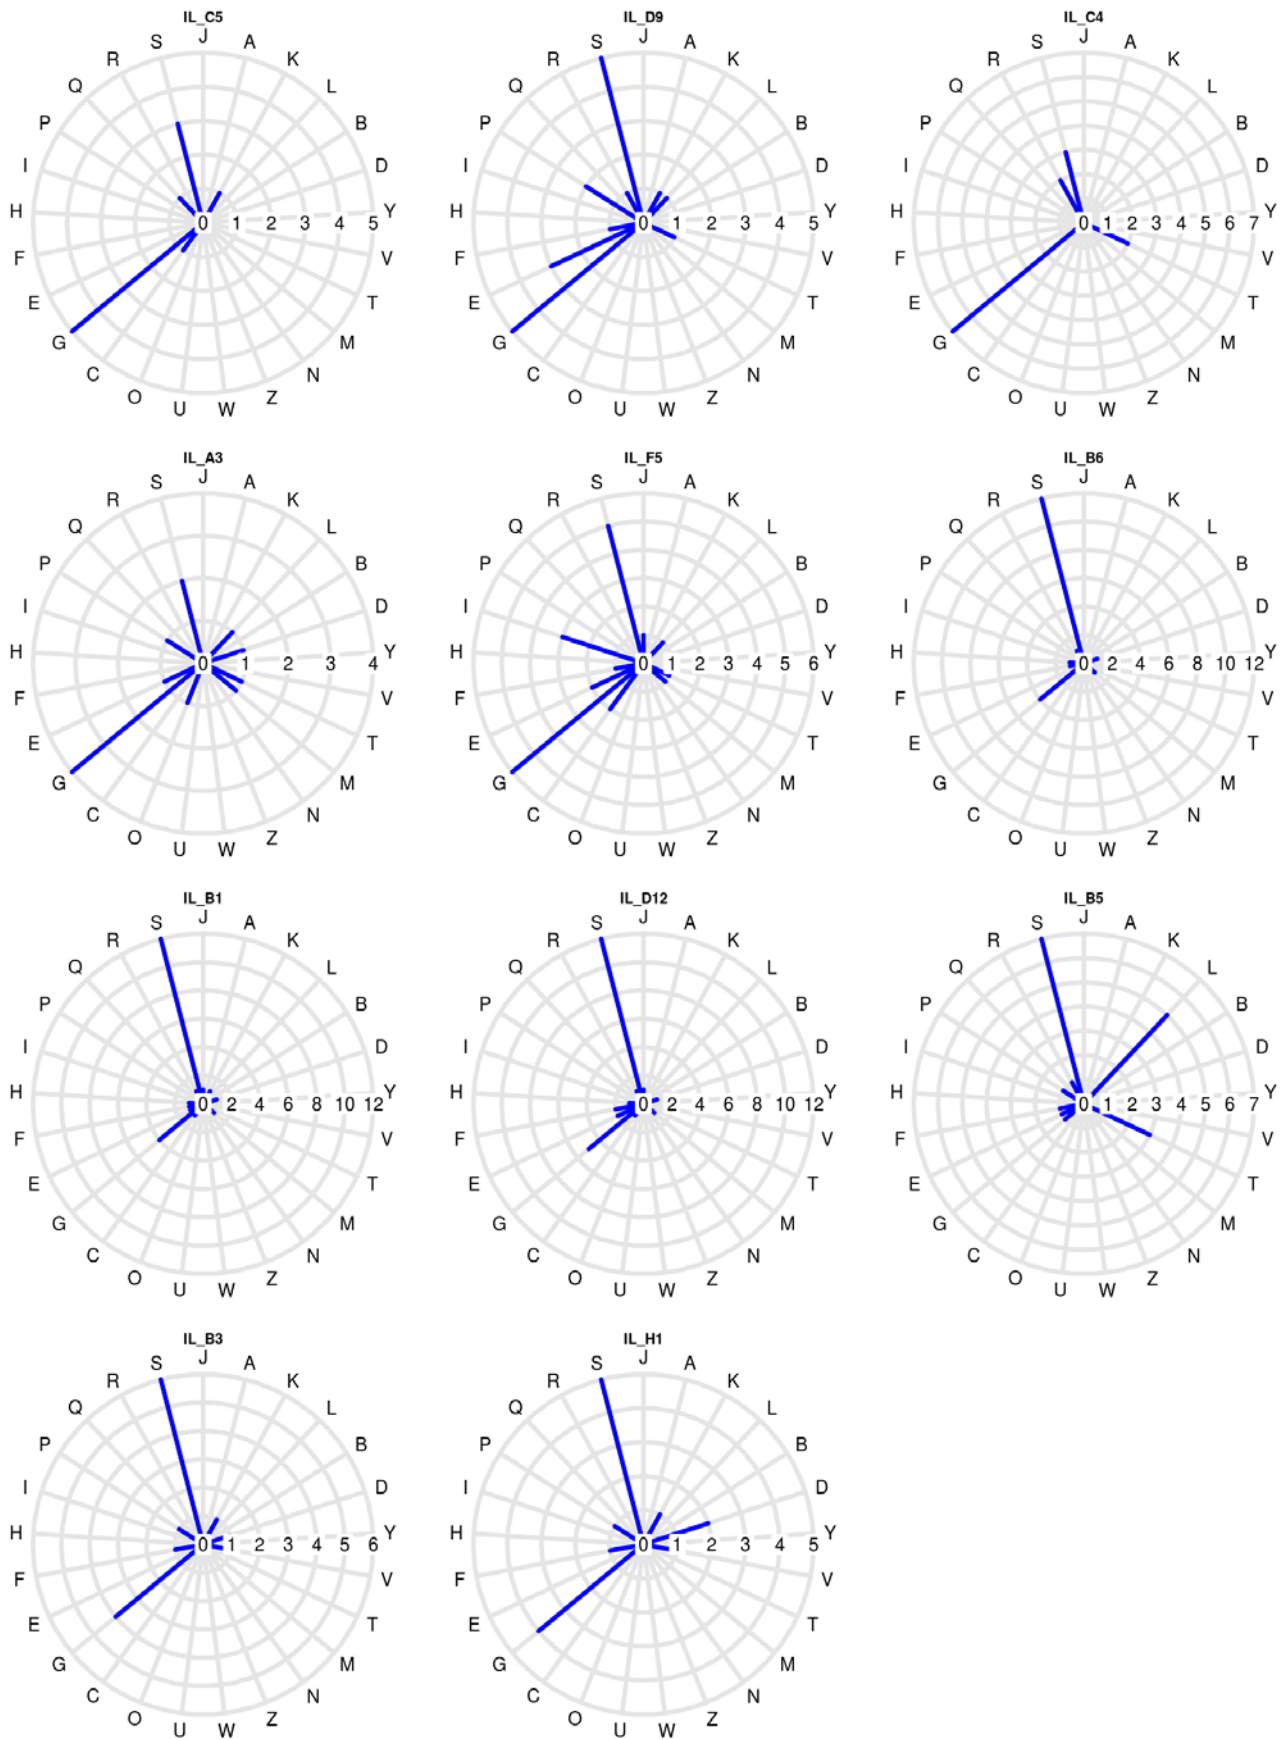

**Figure S1:** Radial plot of EggNOG functional category assignments of the non-redundant CDS for each clone considered individually (see Fig. 3 for the legend).

## SUPPLEMENTARY TABLES

**Table S1:** BlastP output for EggNOG assignments of the non redundant CDS of the eleven clones.

| CDS          | Hit name <sup>a</sup>   | identity (%) | alignment length | mismatches | gap opening | q. start | q. end | s. start | s. end | e-value   | bit score | EggNOGG category <sup>b</sup> | 1st assignati<br>1st letter | 2nd assignati<br>2nd letter | 3rd assignati<br>3rd letter |
|--------------|-------------------------|--------------|------------------|------------|-------------|----------|--------|----------|--------|-----------|-----------|-------------------------------|-----------------------------|-----------------------------|-----------------------------|
| IL_C5_CDS_1  | 585543.HMPREF0969_02168 | 99.06        | 319              | 3          | 0           | 8        | 326    | 1        | 319    | 0.0       | 662       | G                             | bactNOG228 G                | bctoNOG031 G                | NA NA                       |
| IL_C5_CDS_2  | 693979.Bache_0234       | 86.44        | 413              | 55         | 1           | 17       | 429    | 17       | 428    | 0.0       | 755       | G                             | bactNOG246 G                | NA NA                       | NA NA                       |
| IL_C5_CDS_3  | 585543.HMPREF0969_02166 | 98.83        | 427              | 5          | 0           | 1        | 427    | 1        | 427    | 0.0       | 851       | Q                             | bacteNOG04 Q                | bactNOG109 Q                | bctoNOG040 Q                |
| IL_C5_CDS_4  | 585543.HMPREF0969_02165 | 100.00       | 295              | 0          | 0           | 3        | 297    | 1        | 295    | 0.0       | 616       | K                             | bacteNOG01 K                | bactNOG313 K                | bctoNOG017 K                |
| IL_C5_CDS_5  | 585543.HMPREF0969_02164 | 91.40        | 814              | 70         | 0           | 1        | 814    | 1        | 814    | 0.0       | 1546      | G                             | bacteNOG04 G                | bactNOG015 G                | bctoNOG043 G                |
| IL_C5_CDS_6  | 585543.HMPREF0969_02162 | 98.91        | 828              | 9          | 0           | 1        | 828    | 1        | 828    | 0.0       | 1648      | G                             | bacteNOG00 G                | bactNOG054 G                | bctoNOG041 G                |
| IL_C5_CDS_7  | 585543.HMPREF0969_02161 | 99.40        | 334              | 2          | 0           | 1        | 334    | 1        | 334    | 0.0       | 669       | C                             | bacteNOG01 C                | bactNOG228 C                | bctoNOG029 C                |
| IL_C5_CDS_8  | 585543.HMPREF0969_02160 | 99.55        | 671              | 3          | 0           | 1        | 671    | 1        | 671    | 0.0       | 1400      | G                             | bactNOG011 G                | bctoNOG006 G                | NA NA                       |
| IL_C5_CDS_9  | 585543.HMPREF0969_02159 | 100.00       | 212              | 0          | 0           | 1        | 212    | 1        | 212    | 8,00E-144 | 405       | S                             | bacteNOG02 S                | bactNOG868 S                | bctoNOG110 S                |
| IL_C5_CDS_10 | 585543.HMPREF0969_02158 | 100.00       | 209              | 0          | 0           | 1        | 209    | 1        | 209    | 8,00E-140 | 395       | S                             | bacteNOG02 S                | bactNOG808 S                | bctoNOG110 S                |
| IL_C5_CDS_14 | 449673.BACSTE_03758     | 98.43        | 830              | 13         | 0           | 1        | 830    | 1        | 830    | 0.0       | 1709      | S                             | bacteNOG04 S                | bactNOG029 S                | bctoNOG029 S                |
| IL_D9_CDS_1  | 585543.HMPREF0969_01720 | 100.00       | 139              | 0          | 0           | 1        | 139    | 576      | 714    | 3,00E-94  | 293       | K                             | bacteNOG00 K                | bactNOG002 K                | bctoNOG001 K                |
| IL_D9_CDS_2  | 585543.HMPREF0969_01719 | 100.00       | 135              | 0          | 0           | 1        | 135    | 24       | 158    | 2,00E-97  | 283       | R                             | bacteNOG02 R                | bactNOG117 R                | bctoNOG143 R                |
| IL_D9_CDS_3  | 585543.HMPREF0969_01718 | 98.41        | 315              | 5          | 0           | 1        | 315    | 1        | 315    | 0.0       | 552       | E                             | bacteNOG01 E                | bactNOG004 E                | bctoNOG000 E                |
| IL_D9_CDS_4  | 585543.HMPREF0969_01717 | 100.00       | 299              | 0          | 0           | 1        | 299    | 1        | 299    | 0.0       | 596       | E                             | bacteNOG00 E                | bactNOG000 E                | bctoNOG068 E                |
| IL_D9_CDS_5  | 585543.HMPREF0969_01716 | 100.00       | 400              | 0          | 0           | 1        | 400    | 1        | 400    | 0.0       | 831       | L                             | bacteNOG00 L                | bactNOG003 L                | bctoNOG002 L                |
| IL_D9_CDS_6  | 585543.HMPREF0969_01715 | 98.38        | 741              | 12         | 0           | 5        | 745    | 1        | 741    | 0.0       | 1494      | E                             | bacteNOG00 E                | bactNOG004 E                | bctoNOG005 E                |
| IL_D9_CDS_7  | 585543.HMPREF0969_01714 | 99.29        | 424              | 3          | 0           | 1        | 424    | 1        | 424    | 0.0       | 856       | F                             | bacteNOG00 F                | bactNOG001 F                | bctoNOG007 F                |
| IL_D9_CDS_8  | 585543.HMPREF0969_01713 | 100.00       | 331              | 0          | 0           | 1        | 331    | 1        | 331    | 0.0       | 634       | S                             | bacteNOG03 S                | bactNOG101 S                | bctoNOG127 S                |
| IL_D9_CDS_9  | 585543.HMPREF0969_01712 | 100.00       | 159              | 0          | 0           | 1        | 159    | 1        | 159    | 3,00E-112 | 321       | S                             | bacteNOG02 S                | bctoNOG118 S                | NA NA                       |
| IL_D9_CDS_10 | 585543.HMPREF0969_01711 | 98.66        | 224              | 3          | 0           | 1        | 224    | 2        | 225    | 3,00E-165 | 461       | S                             | bacteNOG02 S                | bactNOG237 S                | bctoNOG032 S                |
| IL_D9_CDS_11 | 585543.HMPREF0969_01710 | 99.33        | 300              | 2          | 0           | 1        | 300    | 1        | 300    | 0.0       | 580       | P                             | bacteNOG02 P                | bactNOG239 P                | bctoNOG070 P                |
| IL_D9_CDS_12 | 585543.HMPREF0969_01709 | 99.63        | 269              | 1          | 0           | 1        | 269    | 1        | 269    | 0.0       | 550       | P                             | bacteNOG01 P                | bactNOG098 P                | bctoNOG039 P                |
| IL_D9_CDS_13 | 585543.HMPREF0969_01708 | 99.51        | 607              | 3          | 0           | 23       | 629    | 1        | 607    | 0.0       | 1228      | S                             | bactNOG359 S                | NA NA                       | NA NA                       |
| IL_D9_CDS_14 | 585543.HMPREF0969_01707 | 94.77        | 842              | 44         | 0           | 1        | 842    | 1        | 842    | 0.0       | 1681      | G                             | bactNOG172 G                | bctoNOG048 G                | NA NA                       |
| IL_D9_CDS_15 | 585543.HMPREF0969_01706 | 81.91        | 398              | 72         | 0           | 14       | 411    | 1        | 398    | 0.0       | 700       | G                             | bactNOG036 G                | NA NA                       | NA NA                       |
| IL_D9_CDS_18 | 585543.HMPREF0969_01703 | 97.09        | 791              | 23         | 0           | 1        | 791    | 1        | 791    | 0.0       | 1591      | G                             | bacteNOG01 G                | bactNOG013 G                | bctoNOG011 G                |
| IL_D9_CDS_19 | 585543.HMPREF0969_01702 | 87.60        | 1306             | 159        | 1           | 1        | 1306   | 1        | 1303   | 0.0       | 2355      | T                             | bactNOG000 T                | NA NA                       | NA NA                       |
| IL_D9_CDS_20 | 585543.HMPREF0969_01701 | 96.24        | 559              | 21         | 0           | 1        | 559    | 1        | 559    | 0.0       | 1060      | G                             | bactNOG052 G                | bctoNOG054 G                | NA NA                       |
| IL_D9_CDS_21 | 585543.HMPREF0969_01700 | 96.05        | 633              | 25         | 0           | 1        | 633    | 1        | 633    | 0.0       | 1274      | S                             | bactNOG108 S                | NA NA                       | NA NA                       |
| IL_C4_CDS_9  | 585543.HMPREF0969_01699 | 94.90        | 412              | 21         | 0           | 30       | 441    | 6        | 417    | 0.0       | 824       | G                             | bactNOG036 G                | NA NA                       | NA NA                       |
| IL_C4_CDS_10 | 585543.HMPREF0969_01698 | 98.22        | 844              | 15         | 0           | 1        | 844    | 1        | 844    | 0.0       | 1662      | G                             | bactNOG172 G                | bctoNOG048 G                | NA NA                       |
| IL_C4_CDS_12 | 457424.BFAG_03926       | 88.00        | 375              | 45         | 0           | 1        | 375    | 1        | 375    | 0.0       | 705       | R                             | bactNOG397 R                | bctoNOG033 R                | NA NA                       |
| IL_C4_CDS_15 | 585543.HMPREF0969_01691 | 99.73        | 1114             | 3          | 0           | 1        | 1114   | 1        | 1114   | 0.0       | 2192      | S                             | bacteNOG00 S                | bactNOG054 S                | bctoNOG024 S                |
| IL_C4_CDS_16 | 585543.HMPREF0969_01690 | 99.54        | 218              | 1          | 0           | 1        | 218    | 1        | 218    | 2,00E-163 | 456       | G                             | bactNOG946 G                | bctoNOG097 G                | NA NA                       |
| IL_C4_CDS_19 | 585543.HMPREF0969_01687 | 99.05        | 210              | 2          | 0           | 1        | 210    | 1        | 210    | 4,00E-153 | 429       | T                             | bactNOG159 T                | bctoNOG122 T                | NA NA                       |
| IL_C4_CDS_20 | 585543.HMPREF0969_01686 | 99.76        | 410              | 1          | 0           | 1        | 410    | 1        | 410    | 0.0       | 755       | S                             | bacteNOG01 S                | bactNOG353 S                | bctoNOG075 S                |
| IL_C4_CDS_21 | 585543.HMPREF0969_01685 | 100.00       | 267              | 0          | 0           | 1        | 267    | 1        | 267    | 0.0       | 551       | R                             | bacteNOG01 IQ               | bactNOG012 R                | bctoNOG025 IQ               |
| IL_A3_CDS_7  | 483216.BACEGG_03755     | 92.33        | 404              | 31         | 0           | 1        | 404    | 1        | 404    | 0.0       | 790       | L                             | bacteNOG03 L                | bactNOG028 L                | bctoNOG004 L                |
| IL_A3_CDS_8  | 471870.BACINT_04166     | 97.35        | 718              | 19         | 0           | 1        | 718    | 1        | 718    | 0.0       | 1448      | G                             | bacteNOG00 S                | bactNOG011 G                | bctoNOG006 G                |
| IL_A3_CDS_9  | 763034.HMPREF9446_00608 | 81.90        | 105              | 19         | 0           | 2        | 106    | 42       | 146    | 4,00E-40  | 138       | S                             | bacteNOG03 S                | bactNOG247 D                | bctoNOG154 S                |
| IL_A3_CDS_10 | 471870.BACINT_04168     | 98.83        | 426              | 5          | 0           | 1        | 426    | 1        | 426    | 0.0       | 815       | G                             | bacteNOG00 G                | bactNOG005 G                | bctoNOG007 G                |
| IL_A3_CDS_11 | 471870.BACINT_04169     | 93.60        | 750              | 48         | 0           | 1        | 750    | 1        | 750    | 0.0       | 1418      | G                             | bactNOG024 G                | NA NA                       | NA NA                       |
| IL_A3_CDS_16 | 585543.HMPREF0969_00341 | 86.76        | 1065             | 125        | 4           | 20       | 1084   | 19       | 1067   | 0.0       | 1834      | P                             | bactNOG001 P                | bctoNOG000 P                | NA NA                       |
| IL_A3_CDS_17 | 471870.BACINT_04174     | 96.86        | 700              | 21         | 1           | 74       | 773    | 1        | 699    | 0.0       | 1407      | S                             | bacteNOG01 S                | bactNOG390 S                | bctoNOG044 S                |
| IL_A3_CDS_18 | 471870.BACINT_04175     | 99.45        | 729              | 4          | 0           | 1        | 729    | 1        | 729    | 0.0       | 1483      | E                             | bacteNOG04 R                | bactNOG228 E                | bctoNOG019 E                |
| IL_A3_CDS_19 | 471870.BACINT_04176     | 98.15        | 216              | 4          | 0           | 1        | 216    | 1        | 216    | 9,00E-159 | 445       | T                             | bacteNOG00 T                | bactNOG237 T                | bctoNOG026 T                |
| IL_A3_CDS_20 | 471870.BACINT_04177     | 93.49        | 814              | 53         | 0           | 1        | 814    | 1        | 814    | 0.0       | 1559      | G                             | bactNOG054 G                | NA NA                       | NA NA                       |
| IL_A3_CDS_21 | 471870.BACINT_04178     | 99.05        | 315              | 3          | 0           | 1        | 315    | 2        | 316    | 0.0       | 625       | O                             | bacteNOG00 O                | bactNOG002 O                | bctoNOG003 O                |
| IL_A3_CDS_22 | 471870.BACINT_04179     | 92.06        | 214              | 17         | 0           | 1        | 214    | 1        | 214    | 7,00E-147 | 413       | M                             | bactNOG375 M                | bctoNOG079 M                | NA NA                       |
| IL_A3_CDS_23 | 471870.BACINT_04180     | 95.80        | 834              | 30         | 3           | 1        | 830    | 1        | 833    | 0.0       | 1503      | D                             | bacteNOG01 D                | bactNOG228 D                | bctoNOG012 D                |

**Table S1 (continued):**

| CDS          | Hit name <sup>a</sup>   | identity (%) | alignment length | mismatches | gap opening | q. start | q. end | s. start | s. end | e-value   | bit score | EggNOGG category <sup>b</sup> | 1st assignati | 1st letter | 2nd assignati | 2nd letter | 3rd assignati | 3rd letter |
|--------------|-------------------------|--------------|------------------|------------|-------------|----------|--------|----------|--------|-----------|-----------|-------------------------------|---------------|------------|---------------|------------|---------------|------------|
| IL_F5_CDS_2  | 585543.HMPREF0969_00370 | 99.78        | 453              | 1          | 0           | 1        | 453    | 1        | 453    | 0.0       | 894       | T                             | bacteNOG00T   |            | bactNOG001T   |            | bctoNOG000T   |            |
| IL_F5_CDS_3  | 585543.HMPREF0969_00369 | 100.00       | 495              | 0          | 0           | 1        | 495    | 1        | 495    | 0.0       | 993       | M                             | bacteNOG01M   |            | bactNOG0051M  |            | bctoNOG0027M  |            |
| IL_F5_CDS_4  | 585543.HMPREF0969_00368 | 100.00       | 138              | 0          | 0           | 33       | 170    | 1        | 138    | 2,00E-95  | 278       | I                             | bacteNOG02E   |            | bactNOG0958I  |            | bctoNOG0093I  |            |
| IL_F5_CDS_5  | 585543.HMPREF0969_00367 | 100.00       | 517              | 0          | 0           | 1        | 517    | 1        | 517    | 0.0       | 1070      | I                             | bacteNOG00I   |            | bctoNOG006I   |            | NA            | NA         |
| IL_F5_CDS_6  | 585543.HMPREF0969_00366 | 100.00       | 310              | 0          | 0           | 1        | 310    | 18       | 327    | 0.0       | 606       | S                             | bacteNOG01S   |            | bactNOG0424S  |            | bctoNOG0022S  |            |
| IL_F5_CDS_7  | 585543.HMPREF0969_00365 | 100.00       | 144              | 0          | 0           | 1        | 144    | 1        | 144    | 7,00E-64  | 198       | I                             | bacteNOG02I   |            | bactNOG1525S  |            | bctoNOG151I   |            |
| IL_F5_CDS_8  | 585543.HMPREF0969_00364 | 100.00       | 386              | 0          | 0           | 1        | 386    | 1        | 386    | 0.0       | 665       | C                             | bacteNOG00C   |            | bactNOG0031C  |            | bctoNOG0040C  |            |
| IL_F5_CDS_10 | 585543.HMPREF0969_00362 | 99.51        | 616              | 3          | 0           | 1        | 616    | 1        | 616    | 0.0       | 1217      | G                             | bacteNOG00G   |            | bactNOG0006G  |            | bctoNOG0011G  |            |
| IL_F5_CDS_11 | 585543.HMPREF0969_00360 | 100.00       | 336              | 0          | 0           | 1        | 336    | 1        | 336    | 0.0       | 696       | G                             | bacteNOG00G   |            | bactNOG0025G  |            | bctoNOG0041G  |            |
| IL_F5_CDS_12 | 585543.HMPREF0969_00359 | 98.88        | 267              | 3          | 0           | 10       | 276    | 69       | 335    | 0.0       | 548       | S                             | bacteNOG01S   |            | bactNOG0026S  |            | bctoNOG0022S  |            |
| IL_F5_CDS_13 | 316407.85676327         | 99.67        | 304              | 1          | 0           | 121      | 424    | 4        | 307    | 0.0       | 637       | L                             | bactNOG365L   |            | NA            | NA         | NA            | NA         |
| IL_F5_CDS_14 | 585543.HMPREF0969_00358 | 100.00       | 83               | 0          | 0           | 1        | 83     | 28       | 110    | 6,00E-56  | 174       | J                             | bacteNOG02J   |            | bactNOG246J   |            | bctoNOG135J   |            |
| IL_F5_CDS_16 | 585543.HMPREF0969_00356 | 99.45        | 362              | 2          | 0           | 1        | 362    | 1        | 362    | 0.0       | 751       | E                             | bacteNOG00E   |            | bactNOG0027E  |            | bctoNOG0020E  |            |
| IL_F5_CDS_17 | 585543.HMPREF0969_00355 | 99.75        | 407              | 1          | 0           | 1        | 407    | 1        | 407    | 0.0       | 801       | E                             | bacteNOG00E   |            | bactNOG0027E  |            | bctoNOG0016E  |            |
| IL_F5_CDS_18 | 585543.HMPREF0969_00354 | 100.00       | 470              | 0          | 0           | 1        | 470    | 1        | 470    | 0.0       | 977       | F                             | bacteNOG00F   |            | bactNOG0007F  |            | bctoNOG0005F  |            |
| IL_F5_CDS_20 | 585543.HMPREF0969_00352 | 99.64        | 278              | 1          | 0           | 36       | 313    | 16       | 293    | 0.0       | 588       | C                             | bactNOG996C   |            | NA            | NA         | NA            | NA         |
| IL_F5_CDS_21 | 585543.HMPREF0969_00351 | 99.58        | 717              | 3          | 0           | 1        | 717    | 4        | 720    | 0.0       | 1496      | G                             | bacteNOG00S   |            | bactNOG011G   |            | bctoNOG0006G  |            |
| IL_F5_CDS_23 | 585543.HMPREF0969_00349 | 100.00       | 125              | 0          | 0           | 1        | 125    | 1        | 125    | 2,00E-56  | 177       | S                             | bacteNOG03S   |            | bactNOG253S   |            | bctoNOG154S   |            |
| IL_F5_CDS_24 | 585543.HMPREF0969_00348 | 98.20        | 222              | 4          | 0           | 1        | 222    | 1        | 222    | 4,00E-161 | 450       | S                             | bactNOG119S   |            | NA            | NA         | NA            | NA         |
| IL_F5_CDS_25 | 585543.HMPREF0969_00347 | 99.77        | 429              | 1          | 0           | 1        | 429    | 1        | 429    | 0.0       | 826       | G                             | bacteNOG00G   |            | bactNOG0005G  |            | bctoNOG0007G  |            |
| IL_F5_CDS_26 | 585543.HMPREF0969_00346 | 99.73        | 750              | 2          | 0           | 1        | 750    | 1        | 750    | 0.0       | 1489      | G                             | bacteNOG04G   |            | bactNOG0024G  |            | bctoNOG0006G  |            |
| IL_F5_CDS_27 | 585543.HMPREF0969_00345 | 94.43        | 431              | 22         | 2           | 1        | 430    | 3        | 432    | 0.0       | 830       | S                             | bactNOG198S   |            | bctoNOG0056S  |            | NA            | NA         |
| IL_F5_CDS_28 | 585543.HMPREF0969_00344 | 88.93        | 289              | 32         | 0           | 26       | 314    | 165      | 453    | 0.0       | 553       | G                             | bactNOG525G   |            | NA            | NA         | NA            | NA         |
| IL_B1_CDS_22 | 585543.HMPREF0969_00340 | 98.44        | 963              | 15         | 0           | 21       | 983    | 1        | 963    | 0.0       | 1847      | S                             | bactNOG008S   |            | bctoNOG0009S  |            | NA            | NA         |
| IL_B1_CDS_21 | 585543.HMPREF0969_00338 | 97.79        | 181              | 4          | 0           | 1        | 181    | 1        | 181    | 4,00E-130 | 368       | S                             | bacteNOG03S   |            | bactNOG146S   |            | bctoNOG168S   |            |
| IL_B1_CDS_20 | 585543.HMPREF0969_00337 | 99.68        | 317              | 1          | 0           | 1        | 317    | 1        | 317    | 0.0       | 627       | M                             | bacteNOG00M   |            | bactNOG0014M  |            | bctoNOG0004M  |            |
| IL_B1_CDS_19 | 585543.HMPREF0969_00336 | 98.76        | 161              | 2          | 0           | 1        | 161    | 1        | 161    | 1,00E-114 | 328       | S                             | bacteNOG07S   |            | bactNOG170S   |            | bctoNOG183S   |            |
| IL_B1_CDS_18 | 585543.HMPREF0969_00335 | 99.22        | 255              | 2          | 0           | 6        | 260    | 1        | 255    | 5,00E-175 | 488       | S                             | bacteNOG06S   |            | bactNOG113S   |            | bctoNOG129S   |            |
| IL_B1_CDS_17 | 585543.HMPREF0969_00334 | 100.00       | 192              | 0          | 0           | 1        | 192    | 1        | 192    | 3,00E-131 | 372       | S                             | bacteNOG03S   |            | bactNOG710S   |            | bctoNOG139S   |            |
| IL_B1_CDS_16 | 585543.HMPREF0969_00333 | 99.11        | 338              | 3          | 0           | 1        | 338    | 1        | 338    | 0.0       | 700       | H                             | bacteNOG01H   |            | bactNOG0013H  |            | bctoNOG0057H  |            |
| IL_B1_CDS_15 | 585543.HMPREF0969_00332 | 100.00       | 122              | 0          | 0           | 1        | 122    | 1        | 122    | 1,00E-71  | 216       | S                             | bacteNOG02S   |            | bactNOG942S   |            | bctoNOG124S   |            |
| IL_B1_CDS_14 | 585543.HMPREF0969_00331 | 98.80        | 249              | 3          | 0           | 1        | 249    | 1        | 249    | 5,00E-175 | 488       | D                             | bacteNOG01D   |            | bactNOG0007D  |            | bctoNOG0066D  |            |
| IL_B1_CDS_13 | 585543.HMPREF0969_00330 | 99.16        | 476              | 4          | 0           | 1        | 476    | 1        | 476    | 0.0       | 979       | S                             | bacteNOG00S   |            | bactNOG169S   |            | bctoNOG0013S  |            |
| IL_B1_CDS_12 | 585543.HMPREF0969_00329 | 100.00       | 156              | 0          | 0           | 1        | 156    | 1        | 156    | 1,00E-105 | 304       | S                             | bacteNOG03S   |            | bactNOG120S   |            | bctoNOG143S   |            |
| IL_B1_CDS_11 | 585543.HMPREF0969_00328 | 100.00       | 333              | 0          | 0           | 1        | 333    | 1        | 333    | 0.0       | 612       | S                             | bactNOG038S   |            | NA            | NA         | NA            | NA         |
| IL_B1_CDS_10 | 585543.HMPREF0969_00327 | 98.97        | 292              | 3          | 0           | 1        | 292    | 1        | 292    | 0.0       | 602       | F                             | bacteNOG00F   |            | bctoNOG0004F  |            | NA            | NA         |
| IL_B1_CDS_9  | 585543.HMPREF0969_00326 | 98.92        | 464              | 5          | 0           | 1        | 464    | 1        | 464    | 0.0       | 939       | R                             | bacteNOG00R   |            | bactNOG0001R  |            | bctoNOG0001R  |            |
| IL_B1_CDS_7  | 585543.HMPREF0969_00195 | 99.72        | 359              | 1          | 0           | 1        | 359    | 1        | 359    | 0.0       | 659       | G                             | bacteNOG01G   |            | bactNOG0075G  |            | bctoNOG0009G  |            |
| IL_B1_CDS_6  | 763034.HMPREF9446_00851 | 89.54        | 478              | 50         | 0           | 1        | 478    | 59       | 536    | 0.0       | 825       | C                             | bacteNOG01C   |            | bctoNOG0013C  |            | NA            | NA         |
| IL_B1_CDS_5  | 585543.HMPREF0969_00193 | 100.00       | 196              | 0          | 0           | 1        | 196    | 1        | 196    | 4,00E-143 | 402       | S                             | bacteNOG02S   |            | bactNOG965S   |            | bctoNOG117S   |            |
| IL_B1_CDS_4  | 585543.HMPREF0969_00192 | 100.00       | 220              | 0          | 0           | 1        | 220    | 1        | 220    | 2,00E-151 | 425       | K                             | bacteNOG02K   |            | bactNOG769K   |            | bctoNOG0096K  |            |
| IL_B1_CDS_3  | 585543.HMPREF0969_00191 | 99.44        | 354              | 2          | 0           | 1        | 354    | 13       | 366    | 0.0       | 674       | J                             | bacteNOG00J   |            | bactNOG0008J  |            | bctoNOG0004J  |            |
| IL_B1_CDS_2  | 585543.HMPREF0969_00190 | 99.77        | 428              | 1          | 0           | 1        | 428    | 1        | 428    | 0.0       | 828       | E                             | bacteNOG01E   |            | bactNOG0001E  |            | bctoNOG0010E  |            |
| IL_B1_CDS_1  | 585543.HMPREF0969_00189 | 98.33        | 60               | 1          | 0           | 34       | 93     | 2        | 61     | 4,00E-38  | 138       | S                             | bacteNOG03S   |            | bactNOG198S   |            | bctoNOG0002S  |            |

**Table S1 (continued):**

| CDS          | Hit name <sup>a</sup>   | identity (%) | alignment length | mismatches | gap opening | q. start | q. end | s. start | s. end | e-value   | bit score | EggNOG category <sup>b</sup> | 1st assignati | 1st letter | 2nd assignati | 2nd letter | 3rd assignati | 3rd letter |
|--------------|-------------------------|--------------|------------------|------------|-------------|----------|--------|----------|--------|-----------|-----------|------------------------------|---------------|------------|---------------|------------|---------------|------------|
| IL_B5_CDS_2  | 657318.EUR_02280        | 97.69        | 390              | 5          | 1           | 1        | 386    | 1        | 390    | 0.0       | 765       | G                            | bactNOG228    | G          | firmNOG056    | G          | NA            | NA         |
| IL_B5_CDS_3  | 657318.EUR_02270        | 99.09        | 882              | 8          | 0           | 1        | 882    | 1        | 882    | 0.0       | 1736      | P                            | bactNOG003    | P          | firmNOG000    | P          | NA            | NA         |
| IL_B5_CDS_4  | 657318.EUR_02260        | 100.00       | 106              | 0          | 0           | 20       | 125    | 20       | 125    | 7,00E-72  | 216       | S                            | bactNOG252    | S          | NA            | NA         | NA            | NA         |
| IL_B5_CDS_5  | 657318.EUR_02250        | 98.06        | 103              | 2          | 0           | 1        | 103    | 1        | 103    | 4,00E-68  | 205       | S                            | bactNOG247    | S          | firmNOG268    | S          | NA            | NA         |
| IL_B5_CDS_6  | 657318.EUR_01980        | 98.24        | 397              | 7          | 0           | 1        | 397    | 1        | 397    | 0.0       | 776       | E                            | bactNOG228    | E          | firmNOG001    | E          | NA            | NA         |
| IL_B5_CDS_7  | 657318.EUR_01970        | 96.24        | 186              | 7          | 0           | 44       | 229    | 744      | 929    | 1,00E-122 | 376       | T                            | bactNOG028    | T          | firmNOG003    | T          | NA            | NA         |
| IL_B5_CDS_8  | 657319.EUS_08260        | 100.00       | 76               | 0          | 0           | 1        | 76     | 1        | 76     | 4,00E-47  | 150       | L                            | bactNOG143    | L          | firmNOG276    | L          | NA            | NA         |
| IL_B5_CDS_9  | 657319.EUS_08270        | 100.00       | 125              | 0          | 0           | 1        | 125    | 12       | 136    | 1,00E-70  | 214       | S                            | bactNOG104    | S          | firmNOG182    | S          | NA            | NA         |
| IL_B5_CDS_10 | 717960.EC1_00970        | 100.00       | 101              | 0          | 0           | 1        | 101    | 1        | 101    | 3,00E-67  | 203       | S                            | bactNOG108    | S          | firmNOG182    | S          | NA            | NA         |
| IL_B5_CDS_11 | 657313.RTO_31030        | 97.56        | 573              | 14         | 0           | 1        | 573    | 1        | 573    | 0.0       | 1121      | L                            | bactNOG093    | L          | firmNOG037    | L          | NA            | NA         |
| IL_B5_CDS_12 | 717962.CC1_31590        | 100.00       | 236              | 0          | 0           | 14       | 249    | 1        | 236    | 1,00E-154 | 436       | S                            | bactNOG345    | S          | firmNOG042    | S          | NA            | NA         |
| IL_B5_CDS_13 | 411461.DORFOR_02646     | 99.26        | 270              | 2          | 0           | 1        | 270    | 1        | 270    | 3,00E-164 | 462       | T                            | bactNOG067    | T          | firmNOG108    | T          | NA            | NA         |
| IL_B5_CDS_14 | 657318.EUR_03800        | 100.00       | 310              | 0          | 0           | 1        | 310    | 1        | 310    | 0.0       | 631       | T                            | bactNOG000    | T          | firmNOG079    | T          | NA            | NA         |
| IL_B5_CDS_15 | 657318.EUR_29160        | 98.93        | 559              | 6          | 0           | 1        | 559    | 1        | 559    | 0.0       | 1139      | L                            | bactNOG230    | L          | firmNOG472    | L          | NA            | NA         |
| IL_B5_CDS_21 | 657318.EUR_29220        | 100.00       | 220              | 0          | 0           | 1        | 220    | 1        | 220    | 1,00E-160 | 449       | L                            | firmNOG361    | L          | NA            | NA         | NA            | NA         |
| IL_B5_CDS_22 | 657318.EUR_29230        | 98.83        | 426              | 5          | 0           | 1        | 426    | 1        | 426    | 0.0       | 845       | L                            | bactNOG175    | L          | firmNOG339    | L          | NA            | NA         |
| IL_B5_CDS_24 | 657318.EUR_29250        | 99.35        | 155              | 1          | 0           | 1        | 155    | 1        | 155    | 4,00E-92  | 270       | S                            | bactNOG956    | S          | firmNOG182    | S          | NA            | NA         |
| IL_B5_CDS_28 | 657318.EUR_29810        | 85.37        | 82               | 8          | 2           | 94       | 172    | 134      | 214    | 1,00E-40  | 142       | F                            | bactNOG230    | F          | NA            | NA         | NA            | NA         |
| IL_B5_CDS_30 | 657318.EUR_29830        | 97.80        | 182              | 4          | 0           | 1        | 182    | 1        | 182    | 2,00E-114 | 329       | S                            | bactNOG171    | S          | firmNOG313    | S          | NA            | NA         |
| IL_B5_CDS_34 | 657318.EUR_29870        | 96.15        | 519              | 20         | 0           | 1        | 519    | 1        | 519    | 0.0       | 988       | R                            | bactNOG750    | R          | firmNOG198    | R          | NA            | NA         |
| IL_B3_CDS_2  | 537007.BLAHAN_04440     | 83.78        | 450              | 73         | 0           | 1        | 450    | 1        | 450    | 0.0       | 734       | S                            | bactNOG207    | S          | firmNOG049    | S          | NA            | NA         |
| IL_B3_CDS_3  | 537007.BLAHAN_04443     | 86.26        | 262              | 36         | 0           | 16       | 277    | 15       | 276    | 9,00E-161 | 454       | G                            | bactNOG045    | G          | firmNOG114    | G          | NA            | NA         |
| IL_B3_CDS_4  | 537007.BLAHAN_04444     | 89.12        | 294              | 32         | 0           | 1        | 294    | 1        | 294    | 0.0       | 540       | G                            | bactNOG107    | G          | firmNOG050    | G          | NA            | NA         |
| IL_B3_CDS_5  | 457421.CBFG_01817       | 83.90        | 410              | 64         | 1           | 1        | 408    | 23       | 432    | 0.0       | 693       | G                            | bactNOG228    | G          | firmNOG038    | G          | NA            | NA         |
| IL_B3_CDS_6  | 537007.BLAHAN_04446     | 82.82        | 326              | 56         | 0           | 1        | 326    | 1        | 326    | 0.0       | 545       | K                            | firmNOG021    | K          | NA            | NA         | NA            | NA         |
| IL_B3_CDS_7  | 658655.HMPREF0988_01971 | 94.83        | 116              | 6          | 0           | 1        | 116    | 504      | 619    | 2,00E-70  | 228       | V                            | bactNOG000    | V          | firmNOG005    | V          | NA            | NA         |
| IL_B3_CDS_10 | 657313.RTO_31960        | 95.38        | 65               | 3          | 0           | 5        | 69     | 6        | 70     | 2,00E-39  | 135       | S                            | bactNOG223    | S          | firmNOG033    | L          | NA            | NA         |
| IL_B3_CDS_11 | 657313.RTO_31950        | 100.00       | 63               | 0          | 0           | 1        | 63     | 1        | 63     | 1,00E-36  | 123       | S                            | bactNOG161    | S          | firmNOG310    | S          | NA            | NA         |
| IL_B3_CDS_12 | 657318.EUR_02310        | 99.62        | 524              | 2          | 0           | 1        | 524    | 1        | 524    | 0.0       | 1038      | F                            | bactNOG014    | F          | firmNOG003    | F          | NA            | NA         |
| IL_B3_CDS_13 | 657318.EUR_02300        | 97.44        | 195              | 5          | 0           | 1        | 195    | 1        | 195    | 7,00E-122 | 349       | S                            | bactNOG109    | S          | firmNOG038    | S          | NA            | NA         |
| IL_B3_CDS_15 | 657318.EUR_02280        | 97.69        | 390              | 5          | 1           | 1        | 386    | 1        | 390    | 0.0       | 762       | G                            | bactNOG228    | G          | firmNOG056    | G          | NA            | NA         |
| IL_B3_CDS_16 | 657318.EUR_02270        | 99.32        | 882              | 6          | 0           | 1        | 882    | 1        | 882    | 0.0       | 1741      | P                            | bactNOG003    | P          | firmNOG000    | P          | NA            | NA         |
| IL_B3_CDS_17 | 657318.EUR_02260        | 99.06        | 106              | 1          | 0           | 20       | 125    | 20       | 125    | 4,00E-71  | 214       | S                            | bactNOG252    | S          | NA            | NA         | NA            | NA         |
| IL_B3_CDS_18 | 657318.EUR_02250        | 98.06        | 103              | 2          | 0           | 1        | 103    | 1        | 103    | 4,00E-68  | 205       | S                            | bactNOG247    | S          | firmNOG268    | S          | NA            | NA         |
| IL_B3_CDS_19 | 657318.EUR_02240        | 99.57        | 1388             | 6          | 0           | 1        | 1388   | 1        | 1388   | 0.0       | 2810      | D                            | bactNOG063    | D          | firmNOG000    | D          | NA            | NA         |
| IL_H1_CDS_22 | 657318.EUR_02240        | 98.26        | 172              | 3          | 0           | 1        | 172    | 760      | 931    | 9,00E-109 | 345       | D                            | bactNOG063    | D          | firmNOG000    | D          | NA            | NA         |
| IL_H1_CDS_23 | 657318.EUR_02240        | 99.37        | 319              | 2          | 0           | 1        | 319    | 1070     | 1388   | 0.0       | 655       | D                            | bactNOG063    | D          | firmNOG000    | D          | NA            | NA         |
| IL_H1_CDS_24 | 657318.EUR_02250        | 98.06        | 103              | 2          | 0           | 1        | 103    | 1        | 103    | 4,00E-68  | 205       | S                            | bactNOG247    | S          | firmNOG268    | S          | NA            | NA         |
| IL_H1_CDS_25 | 657318.EUR_02260        | 99.06        | 106              | 1          | 0           | 20       | 125    | 20       | 125    | 4,00E-71  | 214       | S                            | bactNOG252    | S          | NA            | NA         | NA            | NA         |
| IL_H1_CDS_26 | 657318.EUR_02270        | 99.32        | 882              | 6          | 0           | 1        | 882    | 1        | 882    | 0.0       | 1741      | P                            | bactNOG003    | P          | firmNOG000    | P          | NA            | NA         |
| IL_H1_CDS_27 | 657318.EUR_02280        | 97.69        | 390              | 5          | 1           | 1        | 386    | 1        | 390    | 0.0       | 762       | G                            | bactNOG228    | G          | firmNOG056    | G          | NA            | NA         |
| IL_H1_CDS_29 | 657318.EUR_02300        | 96.41        | 195              | 7          | 0           | 1        | 195    | 1        | 195    | 4,00E-120 | 344       | S                            | bactNOG109    | S          | firmNOG038    | S          | NA            | NA         |
| IL_H1_CDS_30 | 657318.EUR_02310        | 99.62        | 524              | 2          | 0           | 1        | 524    | 1        | 524    | 0.0       | 1038      | F                            | bactNOG014    | F          | firmNOG003    | F          | NA            | NA         |
| IL_H1_CDS_31 | 657313.RTO_31950        | 100.00       | 63               | 0          | 0           | 1        | 63     | 1        | 63     | 1,00E-36  | 123       | S                            | bactNOG161    | S          | firmNOG310    | S          | NA            | NA         |
| IL_H1_CDS_32 | 657313.RTO_31960        | 95.38        | 65               | 3          | 0           | 5        | 69     | 6        | 70     | 2,00E-39  | 135       | S                            | bactNOG223    | S          | firmNOG033    | L          | NA            | NA         |
| IL_H1_CDS_35 | 658655.HMPREF0988_01971 | 94.83        | 116              | 6          | 0           | 1        | 116    | 504      | 619    | 2,00E-70  | 228       | V                            | bactNOG000    | V          | firmNOG005    | V          | NA            | NA         |
| IL_H1_CDS_36 | 537007.BLAHAN_04446     | 82.82        | 326              | 56         | 0           | 1        | 326    | 1        | 326    | 0.0       | 545       | K                            | firmNOG021    | K          | NA            | NA         | NA            | NA         |
| IL_H1_CDS_37 | 457421.CBFG_01817       | 83.90        | 410              | 64         | 1           | 1        | 408    | 23       | 432    | 0.0       | 693       | G                            | bactNOG228    | G          | firmNOG038    | G          | NA            | NA         |
| IL_H1_CDS_38 | 537007.BLAHAN_04444     | 89.12        | 294              | 32         | 0           | 1        | 294    | 1        | 294    | 0.0       | 540       | G                            | bactNOG107    | G          | firmNOG050    | G          | NA            | NA         |
| IL_H1_CDS_39 | 537007.BLAHAN_04443     | 86.26        | 262              | 36         | 0           | 16       | 277    | 15       | 276    | 9,00E-161 | 454       | G                            | bactNOG045    | G          | firmNOG114    | G          | NA            | NA         |

<sup>a</sup> Best hits from BlastP homology to proteins from the eggNOG 4.0 database (61) (E-value ≤ 10<sup>-7</sup>, identity percentage ≥ 80%).

<sup>b</sup> according to Powell, S. et al. eggNOG v4.0: nested orthology inference across 3686 organisms. Nucleic acids research 42, D231-239, doi:10.1093/nar/gkt1253 (2014).

**Table S2:** see the separate Excel file.

**Table S3:** Putative activities of the evidenced Glycoside Hydrolase (GH) and Carbohydrate Esterase (CE) families in the eleven positive clones.

|                 |                                                                                                                                                                                                                                                                                                                                                                                                                                                                                                                                                                                                                                                                                                                                                                                                                                                                                                                                                                                                                                                                                                                                                                                     |
|-----------------|-------------------------------------------------------------------------------------------------------------------------------------------------------------------------------------------------------------------------------------------------------------------------------------------------------------------------------------------------------------------------------------------------------------------------------------------------------------------------------------------------------------------------------------------------------------------------------------------------------------------------------------------------------------------------------------------------------------------------------------------------------------------------------------------------------------------------------------------------------------------------------------------------------------------------------------------------------------------------------------------------------------------------------------------------------------------------------------------------------------------------------------------------------------------------------------|
| <b>GH2</b>      | $\beta$ -galactosidase (EC 3.2.1.23) ; $\beta$ -mannosidase (EC 3.2.1.25); $\beta$ -glucuronidase (EC 3.2.1.31); $\alpha$ -L-arabinofuranosidase (EC 3.2.1.55); mannosylglycoprotein endo- $\beta$ -mannosidase (EC 3.2.1.152); exo- $\beta$ -glucosaminidase (EC 3.2.1.165)                                                                                                                                                                                                                                                                                                                                                                                                                                                                                                                                                                                                                                                                                                                                                                                                                                                                                                        |
| <b>GH3</b>      | $\beta$ -glucosidase (EC 3.2.1.21); xylan 1,4- $\beta$ -xylosidase (EC 3.2.1.37); $\beta$ -glucosylceramidase (EC 3.2.1.45); $\beta$ -N-acetylhexosaminidase (EC 3.2.1.52); $\alpha$ -L-arabinofuranosidase (EC 3.2.1.55); glucan 1,3- $\beta$ -glucosidase (EC 3.2.1.58); glucan 1,4- $\beta$ -glucosidase (EC 3.2.1.74); isoprimeverose-producing oligoxyloglucan hydrolase (EC 3.2.1.120); coniferin $\beta$ -glucosidase (EC 3.2.1.126); exo-1,3-1,4-glucanase (EC 3.2.1.-); $\beta$ -N-acetylglucosaminide phosphorylases (EC 2.4.1.-)                                                                                                                                                                                                                                                                                                                                                                                                                                                                                                                                                                                                                                         |
| <b>GH5</b>      | endo- $\beta$ -1,4-glucanase / cellulase (EC 3.2.1.4); endo- $\beta$ -1,4-xylanase (EC 3.2.1.8); $\beta$ -glucosidase (EC 3.2.1.21); $\beta$ -mannosidase (EC 3.2.1.25); $\beta$ -glucosylceramidase (EC 3.2.1.45); glucan $\beta$ -1,3-glucosidase (EC 3.2.1.58); licheninase (EC 3.2.1.73); exo- $\beta$ -1,4-glucanase / cellodextrinase (EC 3.2.1.74); glucan endo-1,6- $\beta$ -glucosidase (EC 3.2.1.75); mannan endo- $\beta$ -1,4-mannosidase (EC 3.2.1.78); cellulose $\beta$ -1,4-cellobiosidase (EC 3.2.1.91); steryl $\beta$ -glucosidase (EC 3.2.1.104); endoglycoceramidase (EC 3.2.1.123); chitosanase (EC 3.2.1.132); $\beta$ -primeverosidase (EC 3.2.1.149); xyloglucan-specific endo- $\beta$ -1,4-glucanase (EC 3.2.1.151); endo- $\beta$ -1,6-galactanase (EC 3.2.1.164); hesperidin 6-O- $\alpha$ -L-rhamnosyl- $\beta$ -glucosidase (EC 3.2.1.168); $\beta$ -1,3-mannanase (EC 3.2.1.-); arabinoxylan-specific endo- $\beta$ -1,4-xylanase (EC 3.2.1.-); mannan transglycosylase (EC 2.4.1.-)                                                                                                                                                                |
| GH5 subfamily 2 | endo- $\beta$ -1,4-glucanase (EC 3.2.1.4); endo- $\beta$ -1,4-xylanase (EC 3.2.1.8); chitosane (EC 3,2,1,132)                                                                                                                                                                                                                                                                                                                                                                                                                                                                                                                                                                                                                                                                                                                                                                                                                                                                                                                                                                                                                                                                       |
| GH5 subfamily 7 | endo $\beta$ -1,4-mannosidase (EC 3.2.1.78); mannan transglycosylase (EC 2.4.1.-); $\beta$ -mannosidase (EC 3.2.1.25)                                                                                                                                                                                                                                                                                                                                                                                                                                                                                                                                                                                                                                                                                                                                                                                                                                                                                                                                                                                                                                                               |
| <b>GH9</b>      | endoglucanase (EC 3.2.1.4); endo- $\beta$ -1,3(4)-glucanase / lichenase-laminarinase (EC 3.2.1.6); $\beta$ -glucosidase (EC 3.2.1.21); lichenase / endo- $\beta$ -1,3-1,4-glucanase (EC 3.2.1.73); exo- $\beta$ -1,4-glucanase / cellodextrinase (EC 3.2.1.74); cellobiohydrolase (EC 3.2.1.91); xyloglucan-specific endo- $\beta$ -1,4-glucanase / endo-xyloglucanase (EC 3.2.1.151); exo- $\beta$ -glucosaminidase (EC 3.2.1.165)                                                                                                                                                                                                                                                                                                                                                                                                                                                                                                                                                                                                                                                                                                                                                 |
| <b>GH13</b>     | $\alpha$ -amylase (EC 3.2.1.1); pullulanase (EC 3.2.1.41); cyclomaltodextrin glucanotransferase (EC 2.4.1.19); cyclomaltodextrinase (EC 3.2.1.54); trehalose-6-phosphate hydrolase (EC 3.2.1.93); oligo- $\alpha$ -glucosidase (EC 3.2.1.10); maltogenic amylase (EC 3.2.1.133); neopullulanase (EC 3.2.1.135); $\alpha$ -glucosidase (EC 3.2.1.20); maltotetraose-forming $\alpha$ -amylase (EC 3.2.1.60); isoamylase (EC 3.2.1.68); glucodextranase (EC 3.2.1.70); maltohexaose-forming $\alpha$ -amylase (EC 3.2.1.98); maltotriose-forming $\alpha$ -amylase (EC 3.2.1.116); branching enzyme (EC 2.4.1.18); trehalose synthase (EC 5.4.99.16); 4- $\alpha$ -glucanotransferase (EC 2.4.1.25); maltopentaose-forming $\alpha$ -amylase (EC 3.2.1.-); amylosucrase (EC 2.4.1.4); sucrose phosphorylase (EC 2.4.1.7); malto-oligosyltrehalose trehalohydrolase (EC 3.2.1.141); isomaltulose synthase (EC 5.4.99.11); malto-oligosyltrehalose synthase (EC 5.4.99.15); amylo- $\alpha$ -1,6-glucosidase (EC 3.2.1.33); $\alpha$ -1,4-glucan: phosphate $\alpha$ -maltosyltransferase (EC 2.4.99.16); 6 <sup>7</sup> -P-sucrose phosphorylase (EC 2.4.1.-); amino acid transporter. |
| <b>GH16</b>     | xyloglucan:xyloglucosyltransferase (EC 2.4.1.207); keratan-sulfate endo-1,4- $\beta$ -galactosidase (EC 3.2.1.103); endo-1,3- $\beta$ -glucanase (EC 3.2.1.39); endo-1,3(4)- $\beta$ -glucanase (EC 3.2.1.6); licheninase (EC 3.2.1.73); $\beta$ -agarase (EC 3.2.1.81); $\kappa$ -carrageenase (EC 3.2.1.83); xyloglucanase (EC 3.2.1.151); endo- $\beta$ -1,3-galactanase (EC 3.2.1.181); $\beta$ -porphyranase (EC 3.2.1.178); hyaluronidase (EC 3.2.1.35); endo- $\beta$ -1,4-galactosidase (EC 3.2.1.-); chitin $\beta$ -1,6-glucanosyltransferase (EC 2.4.1.-); endo- $\beta$ -1,4-galactosidase (EC 3.2.1.-)                                                                                                                                                                                                                                                                                                                                                                                                                                                                                                                                                                 |
| <b>GH20</b>     | $\beta$ -hexosaminidase (EC 3.2.1.52); lacto-N-biosidase (EC 3.2.1.140); $\beta$ -1,6-N-acetylglucosaminidase) (EC 3.2.1.-); $\beta$ -6-SO <sub>3</sub> -N-acetylglucosaminidase (EC 3.2.1.-)                                                                                                                                                                                                                                                                                                                                                                                                                                                                                                                                                                                                                                                                                                                                                                                                                                                                                                                                                                                       |
| <b>GH31</b>     | $\alpha$ -glucosidase (EC 3.2.1.20); $\alpha$ -galactosidase (EC 3.2.1.22); $\alpha$ -mannosidase (EC 3.2.1.24); $\alpha$ -1,3-glucosidase (EC 3.2.1.84); sucrase-isomaltase (EC 3.2.1.48) (EC 3.2.1.10); $\alpha$ -xylosidase (EC 3.2.1.177); $\alpha$ -glucan lyase (EC 4.2.2.13); isomaltosyltransferase (EC 2.4.1.-); oligosaccharide $\alpha$ -1,4-glucosyltransferase (EC 2.4.1.161)                                                                                                                                                                                                                                                                                                                                                                                                                                                                                                                                                                                                                                                                                                                                                                                          |
| <b>GH32</b>     | invertase (EC 3.2.1.26); endo-inulinase (EC 3.2.1.7); $\beta$ -2,6-fructan 6-levanbiohydrolase (EC 3.2.1.64); endo-levanase (EC 3.2.1.65); exo-inulinase (EC 3.2.1.80); fructan $\beta$ -(2,1)-fructosidase/1-exohydrolase (EC 3.2.1.153); fructan $\beta$ -(2,6)-fructosidase/6-exohydrolase (EC 3.2.1.154); sucrose:sucrose 1-fructosyltransferase (EC 2.4.1.99); fructan:fructan 1-fructosyltransferase (EC 2.4.1.100); sucrose:fructan 6-fructosyltransferase (EC 2.4.1.10); fructan:fructan 6G-fructosyltransferase (EC 2.4.1.243); levant fructosyltransferase (EC 2.4.1.-); [retaining] sucrose:sucrose 6-fructosyltransferase (6-SST) (EC 2.4.1.-); cyclinulo-oligosaccharide fructanotransferase (EC 2.4.1.-)                                                                                                                                                                                                                                                                                                                                                                                                                                                              |
| <b>GH91</b>     | inulin lyase [DFA-I-forming] (EC 4.2.2.17); inulin lyase [DFA-III-forming] (EC 4.2.2.18); difructofuranose 1,2':2,3' dianhydride hydrolase [DFA-IIIase] (EC 3.2.1.-)                                                                                                                                                                                                                                                                                                                                                                                                                                                                                                                                                                                                                                                                                                                                                                                                                                                                                                                                                                                                                |
| <b>GH94</b>     | cellobiose phosphorylase (EC 2.4.1.20); laminaribiose phosphorylase (EC 2.4.1.31); cellodextrin phosphorylase (EC 2.4.1.49); chitobiose phosphorylase (EC 2.4.1.-); cyclic $\beta$ -1,2-glucan synthase (EC 2.4.1.-); cellobionic acid phosphorylase (EC 2.4.1.321); $\beta$ -1,2-oligoglucan phosphorylase (EC 2.4.1.-)                                                                                                                                                                                                                                                                                                                                                                                                                                                                                                                                                                                                                                                                                                                                                                                                                                                            |
| <b>GH97</b>     | glucoamylase (EC 3.2.1.3); $\alpha$ -glucosidase (EC 3.2.1.20); $\alpha$ -galactosidase (EC 3.2.1.22)                                                                                                                                                                                                                                                                                                                                                                                                                                                                                                                                                                                                                                                                                                                                                                                                                                                                                                                                                                                                                                                                               |
| <b>GH127</b>    | $\beta$ -L-arabinofuranosidase (EC 3.2.1.185)                                                                                                                                                                                                                                                                                                                                                                                                                                                                                                                                                                                                                                                                                                                                                                                                                                                                                                                                                                                                                                                                                                                                       |
| <b>CE4</b>      | acetyl xylan esterase (EC 3.1.1.72); chitin deacetylase (EC 3.5.1.41); chitoooligosaccharide deacetylase (EC 3.5.1.-); peptidoglycan GlcNAc deacetylase (EC 3.5.1.-); peptidoglycan N-acetylmuramic acid deacetylase (EC 3.5.1.-).                                                                                                                                                                                                                                                                                                                                                                                                                                                                                                                                                                                                                                                                                                                                                                                                                                                                                                                                                  |
| <b>CE7</b>      | acetyl xylan esterase (EC 3.1.1.72); cephalosporin-C deacetylase (EC 3.1.1.41).                                                                                                                                                                                                                                                                                                                                                                                                                                                                                                                                                                                                                                                                                                                                                                                                                                                                                                                                                                                                                                                                                                     |

<sup>a</sup>: according to the CAZY website ([www.cazy.org](http://www.cazy.org)), update from april 2016.

**Legend:**

|                                          |
|------------------------------------------|
| exo-hydrolase containing family          |
| endo-hydrolase containing family         |
| exo and endo-hydrolase containing family |

**Table S4:** see the separate Excel file.

**Table S5:** see the separate Excel file.
